# Supplementary material for: Describing Supportive Care Programming Access and Comfort Gathering through the COVID-19 Pandemic: An Observational Mixed Methods Study with Adults Affected by Cancer
Source: MDPI journal article supplement (doi:10.3390/curroncol30030198), 2023-02-22
Supplement: s1 [file s1]

Supplementary File S1  
Closed- and open-ended researcher-generated items assessing supportive care programming  
access and comfort gathering

1. Were you told about supportive care programming (i.e., free or fee-based programming to address the psychological, emotional, social, spiritual and physical concerns of cancer) after your cancer diagnosis?

☐ Yes

☐ No

2. Have you ever engaged in supportive care programming related to your cancer diagnosis?

☐ Yes

☐ No

3. Since the start of the pandemic, did you participate in supportive care programming?

☐ Yes

☐ No

i) If yes, did you participate in more or less supportive care programming than before COVID-19?

☐ Much more

☐ More

☐ About the same

☐ Less

☐ Much less

4. Please use this space for any other comments about your engagement in supportive care programming during COVID-19.

5. What level of COVID-19 precautions are you currently practicing?

☐ Primarily self-isolating

☐ Mostly self-isolating at home but going into the community for essentials or appointments

☐ Socializing in small groups, occasionally with physical distancing

☐ Not taking any precautions at all

☐ Other, please specify:

6. What are your primary concerns about starting or returning to IN-PERSON supportive care and/or physical activity programming? Please check all that apply.

☐ Transportation

☐ Being around others

- ☐ Leaving home
- ☐ Travelling to another community
- ☐ Personal health status
- ☐ Risk of catching or spreading COVID-19
- ☐ Uncertainty with cleanliness of the facility or environment
- ☐ No childcare support
- ☐ I have no concerns
- ☐ Other, please specify:

7. Which environment(s), if any, are you comfortable with outside of your home? Please check all that apply.

- ☐ Not comfortable outside my home yet
- ☐ One on one meeting outdoors
- ☐ One on one meeting indoors
- ☐ Small group (10 people or less) event outdoors
- ☐ Small group (10 people or less) event indoors (cafe, restaurant, office etc.)
- ☐ Medium group (10-20 people) event outdoors
- ☐ Medium group (10-20 people) event indoors (cafe, restaurant, community centre etc.)
- ☐ Large group (20+ people) event outdoors
- ☐ Large group (20+ people) event indoors (community centre, restaurant, hall etc.)
- ☐ Other, please specify:

8. How comfortable would you be participating in programming IN-PERSON, INDOORS right now?

- ☐ Not at all comfortable
- ☐ A little comfortable
- ☐ Somewhat comfortable
- ☐ Quite a lot comfortable
- ☐ Completely comfortable

9. What general conditions or safety protocols would have to be in place for you to feel comfortable attending supportive care programming IN-PERSON, INDOORS? Select all that apply.

- ☐ 2 meter distancing
- ☐ Vaccine passports
- ☐ Outdoors only
- ☐ Temperature checks
- ☐ Hand sanitizing station
- ☐ Face masks and other personal protective equipment
- ☐ Limited number of attendees
- ☐ Environment that is not open to the general public

- ☐ Good airflow
- ☐ Being around people I know
- ☐ I am not comfortable with in-person, indoor gathering

10. How comfortable would you be participating in programming IN-PERSON, OUTDOORS right now?

- ☐ Not at all comfortable
- ☐ A little comfortable
- ☐ Somewhat comfortable
- ☐ Quite a lot comfortable
- ☐ Completely comfortable

11. What general conditions or safety protocols would have to be in place for you to feel comfortable attending supportive care programming IN-PERSON, OUTDOORS? Select all that apply.

- ☐ 2 meter distancing
- ☐ Vaccine passports
- ☐ Outdoors only
- ☐ Temperature checks
- ☐ Hand sanitizing station
- ☐ Face masks and other personal protective equipment
- ☐ Limited number of attendees
- ☐ Environment that is not open to the general public
- ☐ Being around people I know
- ☐ I am not comfortable with in-person, outdoor gathering
